# Supplementary material for: Cobalt protoporphyrin IX increases endogenous G‐CSF and mobilizes HSC and granulocytes to the blood
Source: PubMed Central journal article supplement (PMC6895613; doi:10.15252/emmm.201809571), 2019-11-11
Supplement: EMMM-11-e09571-s001.pdf [file EMMM-11-e09571-s001.pdf]

Cobalt protoporphyrin IX increases endogenous G-CSF and mobilizes HSC and granulocytes to the blood

## **Table of contents:**

**Figure S1.** Plasma concentrations of selected growth factors in plasma of C3H mice treated with CoPP and SnPP measured by Luminex assay.

**Figure S2.** The percentage of cells isolated from C57BL/6xFVB mice treated with G-CSF or CoPP that are producing reactive oxygen species after incubation with indicated stimuli.

**Figure S3.** KLS cells in the blood and bone marrow.

**Figure S4.** Complete blood cell count in recipient mice 4 weeks after mobilized blood transplantation.

**Figure S5.** G-CSF is increased in the spleen after CoPP treatment.

**Figure S6.** Monocytes percentage in PB of Nrf2<sup>+/+</sup> and Nrf2<sup>-/-</sup> mice.

**Figure S7.** Quantum yield of singlet oxygen formation measured by the laser flash photolysis.

**Figure S8.** Inflammation and toxicity markers measured in plasma of C57BL6xFVB mice injected with G-CSF, CoPP or solvent controls.

**Figure S9.** Example analysis of GFP chimerism in peripheral blood of mice after mobilized blood transplantation.

**Figure S10.** Example of gating strategy of granulocytes in the blood.

**Figure S11.** Example of gating strategy of CD11b<sup>+</sup>F4/80<sup>+</sup>MHCi<sup>ow</sup>Ly6G<sup>+</sup> macrophages in the bone marrow.

**Figure S12.** Example gating of HSPC populations in PB.

**Figure S13.** Example analysis of main leukocyte populations in blood.

**Figure S14.** Gating strategy for Phagoburst assay analysis.

**Table S1.** Antibodies and reagents used for flow cytometry.

**Table S2.** Exact p values and statistical tests used.

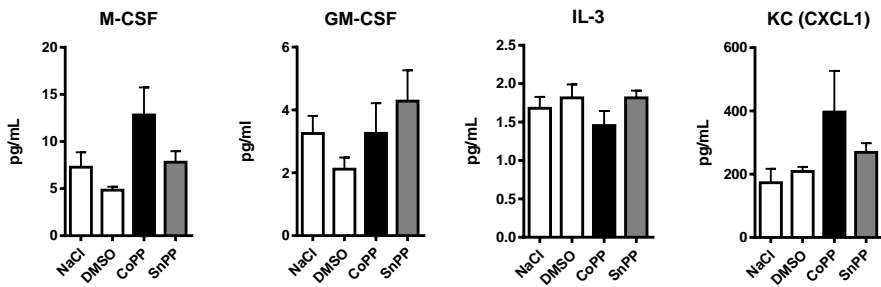

**Appendix Figure S1. Plasma concentrations of selected growth factors in plasma of C3H mice treated with CoPP and SnPP measured by Luminex assay.**

C3H mice were injected with CoPP, SnPP or solvent controls (NaCl, DMSO) each second day for 5 days. Samples were collected 24 hours after the last injection. Results are shown mean + SEM, one-way Anova with Bonferroni post-test, n = 5 mice per group.

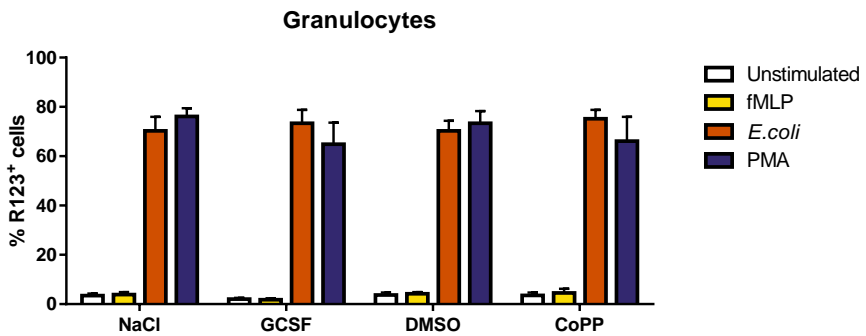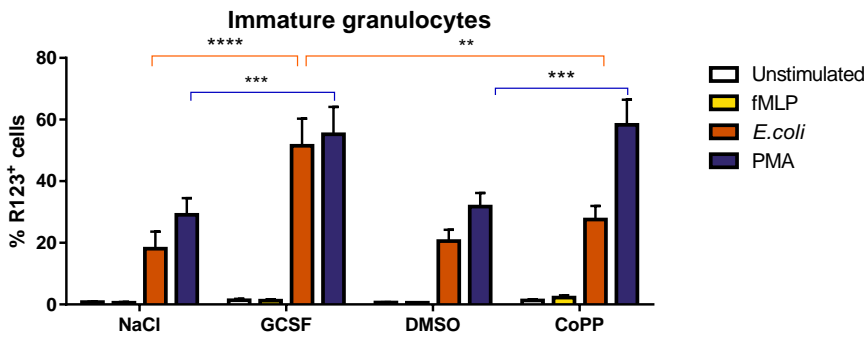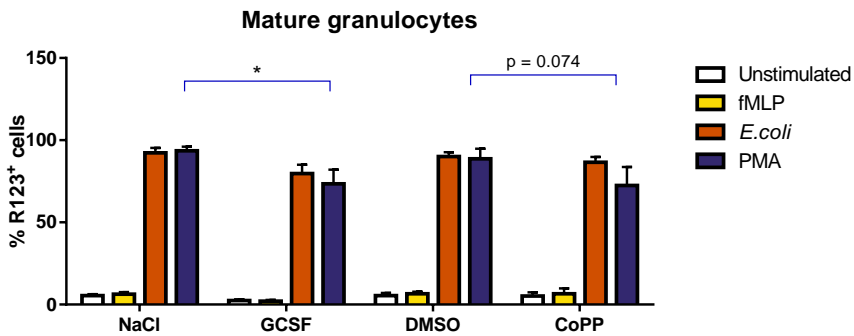

**Appendix Figure S2.** The percentage of cells isolated from C57BL/6xFVB mice treated with G-CSF or CoPP that are producing reactive oxygen species after incubation with indicated stimuli (mean + SEM, two-way Anova with Bonferroni post-test, n = 6 mice per group). Total granulocytes from mice treated with G-CSF and CoPP show similar ROS production as granulocytes from control mice upon stimulation with *E. Coli* or PMA. Granulocytes with immature phenotype mobilized with CoPP and G-CSF and stimulated with PMA showed higher ROS production than non-mobilized immature phenotype granulocytes, however only G-CSF mobilized immature granulocytes showed higher ROS production upon *E. Coli* stimulation. Among granulocytes with mature phenotype, after G-CSF mobilization the ROS production decreased upon PMA stimulation, while only trend to decreased ROS production was observed in CoPP-mobilized mature phenotype. The ROS production upon *E. Coli* stimulation in mature granulocytes did not differ between mobilized and nonmobilized group.

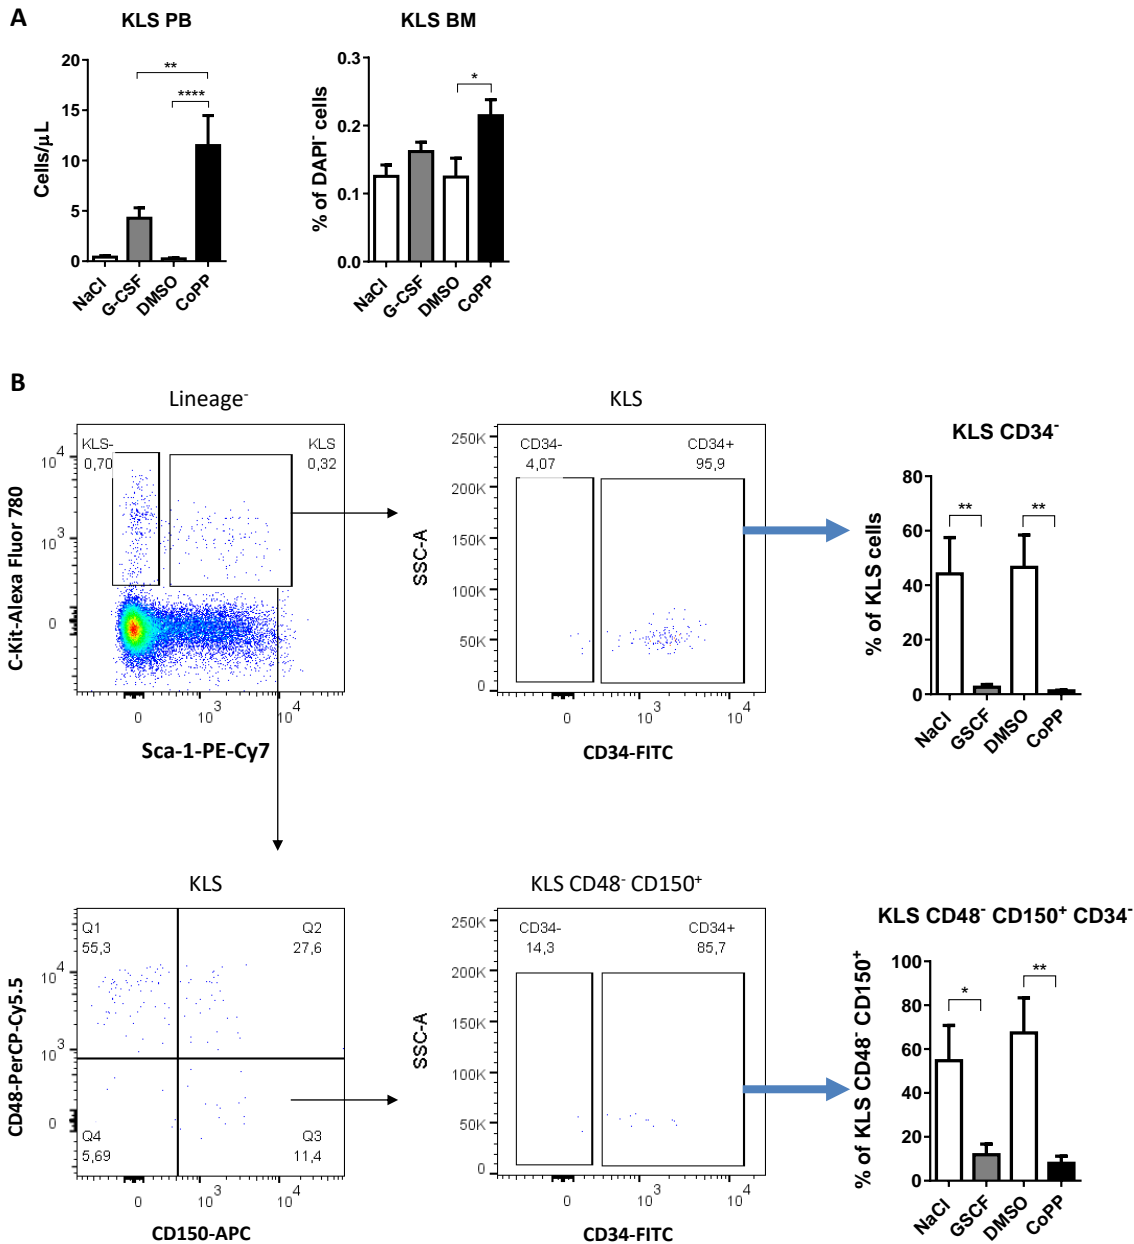

**Appendix Figure S3. KLS cells in the blood and bone marrow.** (A) Number of KLS (c-Kit<sup>+</sup>Lin<sup>-</sup>Sca-1<sup>+</sup>) cells in blood and percentage of KLS cells in the bone marrow (B) Percentage of CD34<sup>-</sup> cells among KLS (c-Kit<sup>+</sup>Lin<sup>-</sup>Sca-1<sup>+</sup>) and KLS CD48<sup>-</sup>CD150<sup>+</sup> populations in blood of mice mobilized with G-CSF or CoPP. Results are shown as mean + individual values plotted, one-way Anova with Bonferroni post-test, n = 7 mice per group.

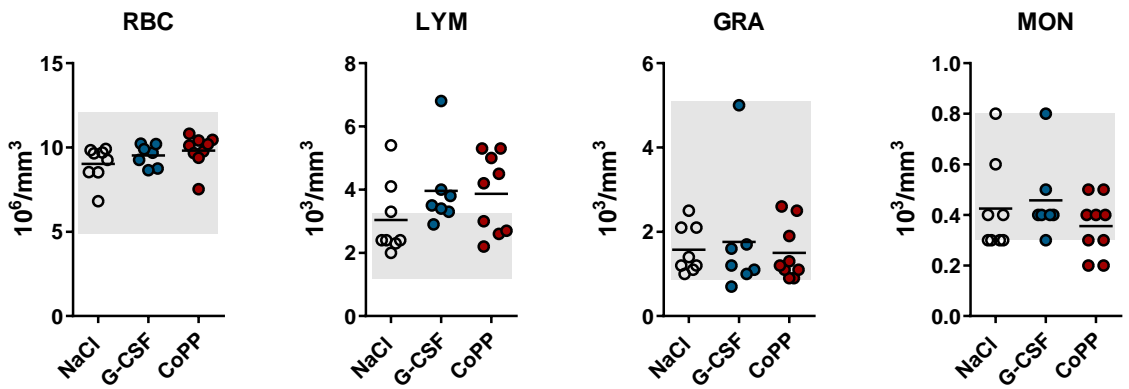

**Appendix Figure S4. Complete blood cell count in recipient mice 4 weeks after mobilized blood transplantation.** Donor GFP<sup>+</sup> mice were treated with NaCl, G-CSF or CoPP daily. At the 5th day of treatment we transplanted  $5 \times 10^6$  of isolated PBMC to the lethally irradiated GFP<sup>-</sup> recipient mice, together with  $10^5$  GFP<sup>-</sup> BM-derived competitor cells. Four weeks after transplantation lymphocytes, granulocytes, monocytes, and RBC values reached the physiological range, without differences between the groups (mean + individual values, one-way Anova with Bonferroni post-test, NaCl: n = 8, G-CSF: n = 7, CoPP: n = 9 mice per group).

RBC – number of red blood cells

LYM – number of lymphocytes

GRA – number of granulocytes

MON – number of monocytes.

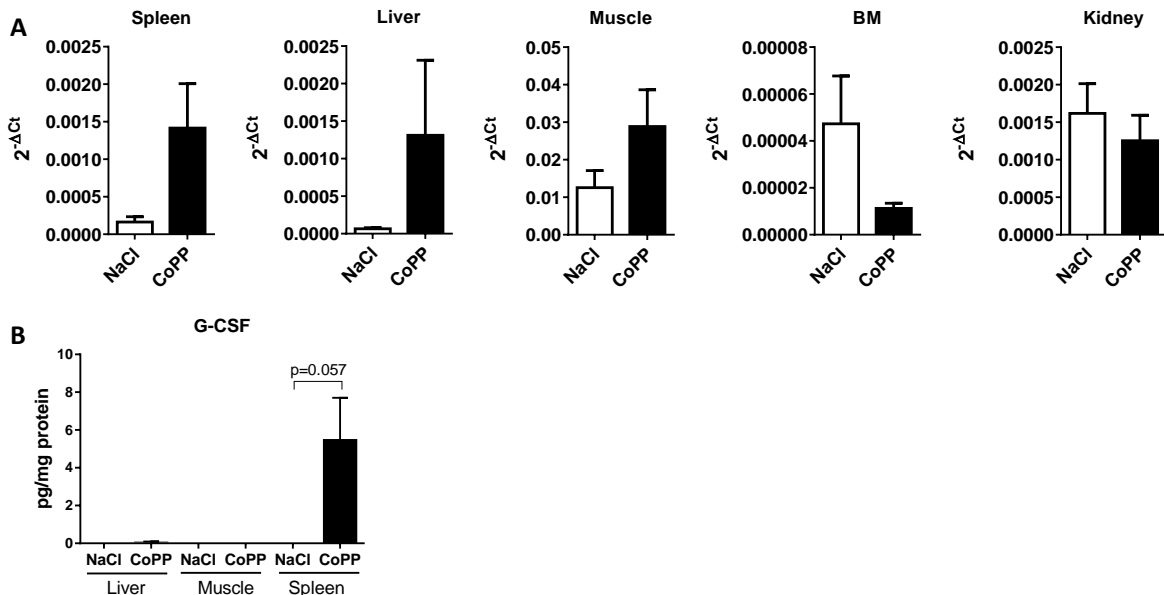

**Appendix Figure S5. G-CSF is increased in the spleen after CoPP treatment**  
 mRNA for G-CSF was detectable in the spleen, liver and muscle lysate (**A**) whereas G-CSF protein was increased only in the spleen lysate (**B**) after CoPP treatment (mean + SEM, unpaired two-tailed T-test, NaCl: n = 5, CoPP: n = 6 mice per group).

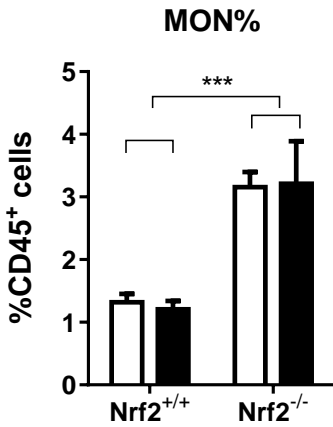

**Appendix Figure S6. Monocytes percentage in PB of Nrf2<sup>+/+</sup> and Nrf2<sup>-/-</sup> mice.** Nrf2-deficient and control C57BL/6 mice were injected with CoPP everyday for 5 days and sacrificed 6 hours after last injection (mean + SEM, two-way Anova with Bonferroni post-test, DMSO: n = 4, CoPP: n = 5 mice per group).

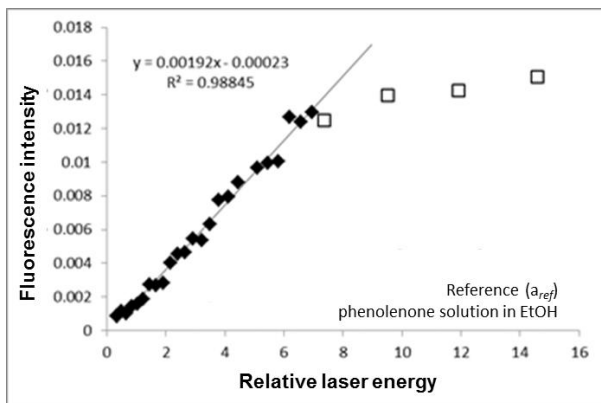

$$\Phi_{\Delta} = \Phi_{\Delta ref} \cdot \frac{a}{a_{ref}}$$

| $\Phi_{\Delta}$ SnPP | $\Phi_{\Delta}$ CoPP |
|----------------------|----------------------|
| 0.89                 | 0                    |

**Appendix Figure S7. Quantum yield of singlet oxygen formation measured by the laser flash photolysis.**



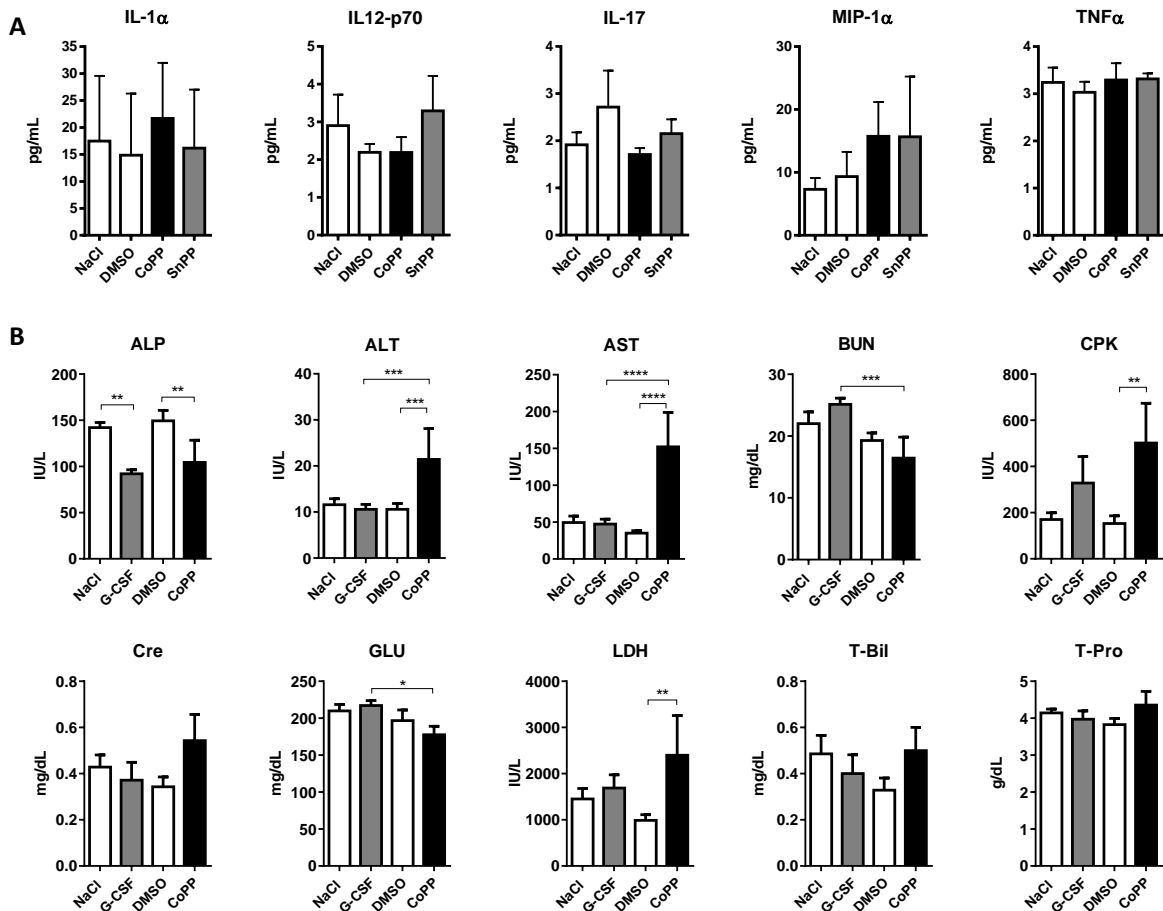

**Appendix Figure S8. Inflammation and toxicity markers measured in plasma of C57BL6xFVB mice injected with G-CSF, CoPP or solvent controls (NaCl, DMSO) every day for 5 days. Samples were collected 6 hours after the last injection and frozen at -80°C (mean + SEM, one-way Anova with Bonferroni post-test, 7 mice per group). (A) Concentrations of proinflammatory cytokines measured by Luminex assay. (B) Liver and kidney muscle toxicity markers measured using SpotChem EZ Chemistry Analyzer (ALP - alkaline phosphatase, ALT - alanine transaminase, Cre - creatinine, GLU- glucose, T-Pro - total protein, BUN - blood urea nitrogen, ALT - aspartate transaminase, CPK - creatine kinase, LDH - lactate dehydrogenase, T-Bil - total bilirubin). Amounts of gamma-GT were undetectable.**

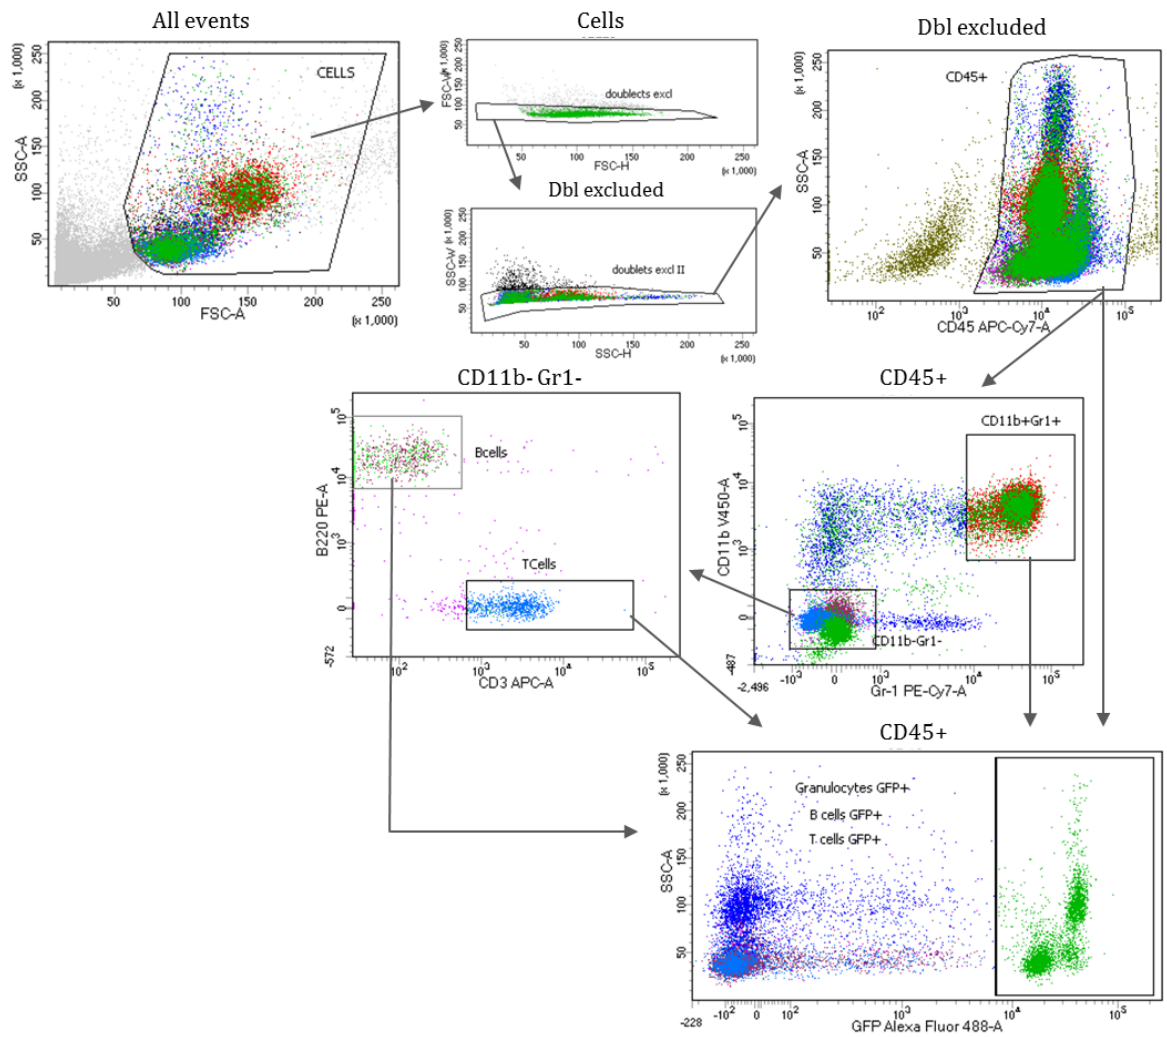

**Appendix Figure S9. Example analysis of GFP chimerism in peripheral blood of mice after mobilized blood transplantation.**

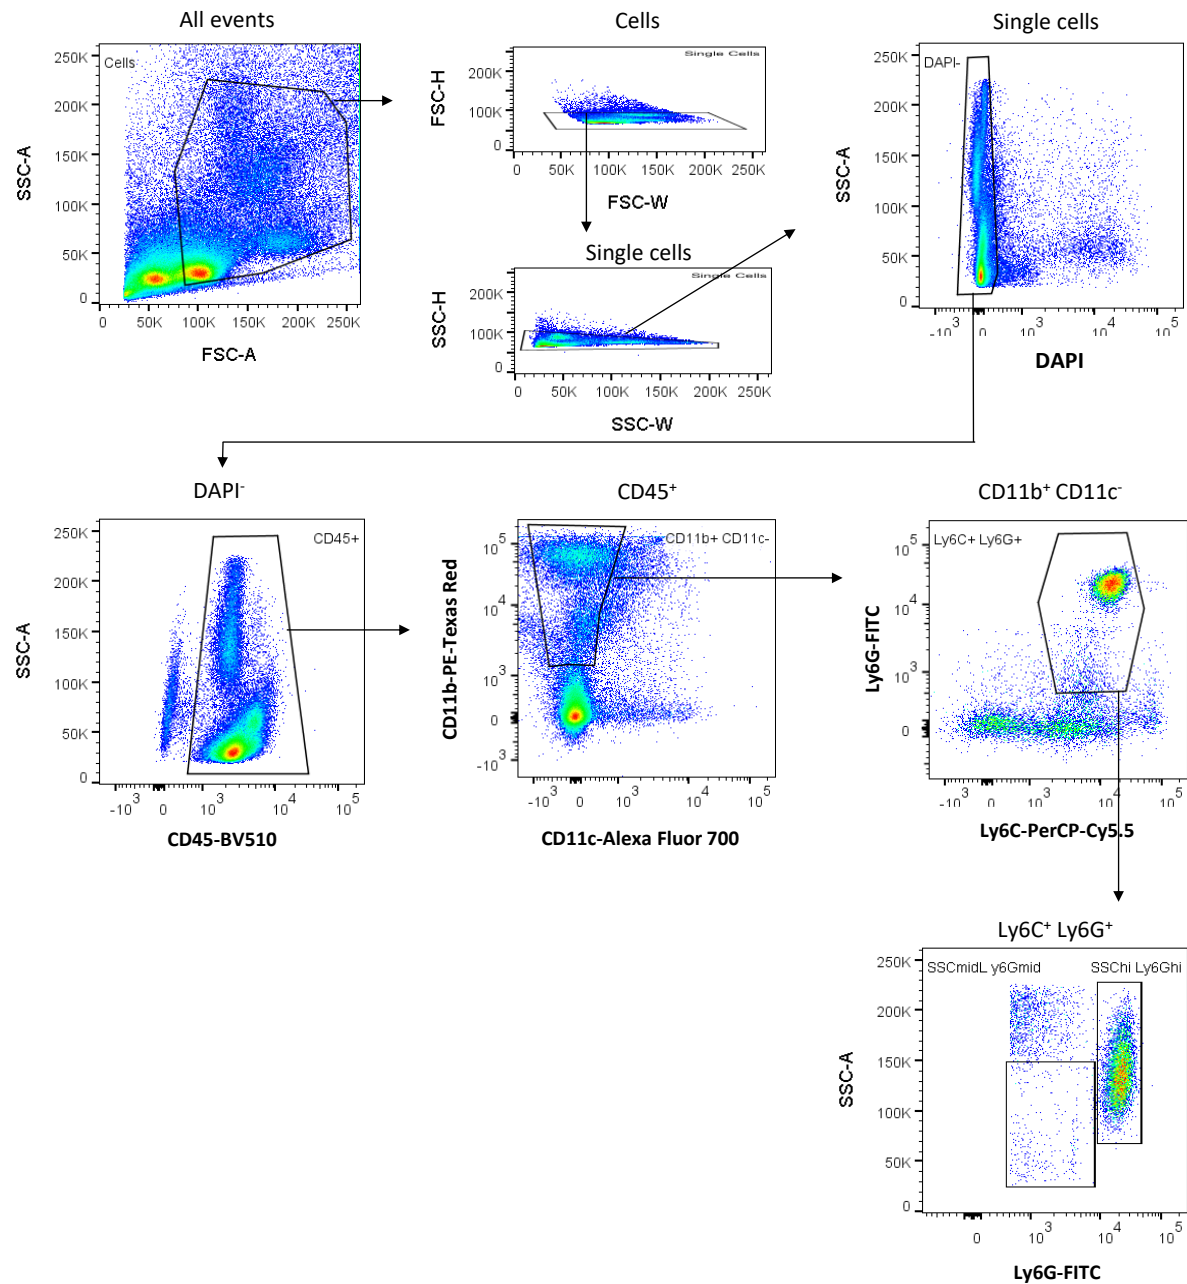

**Appendix Figure S10. Example of gating strategy of granulocytes in the blood.**

All events

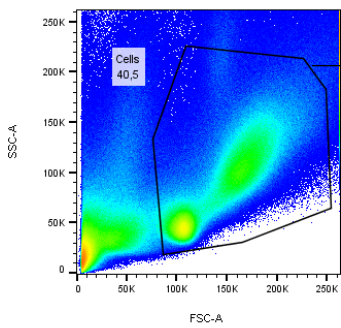

Cells

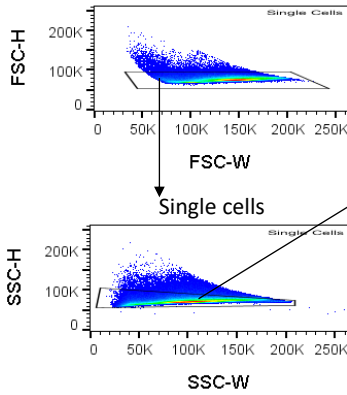

Single cells

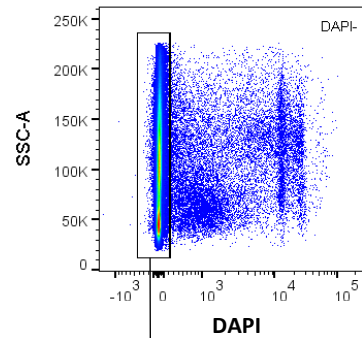

DAPI<sup>-</sup>

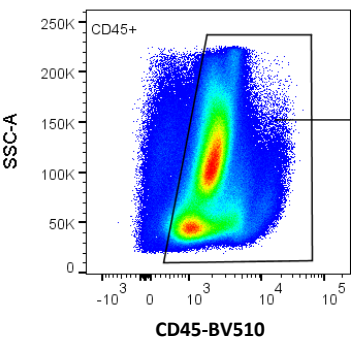

CD45<sup>+</sup>

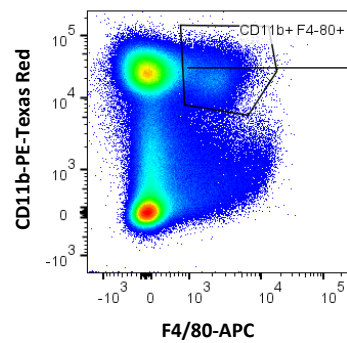

CD11b<sup>+</sup> F4/80<sup>+</sup>

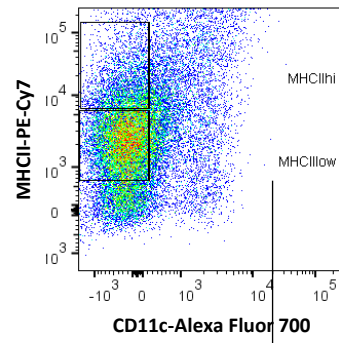

MHCI<sup>low</sup>

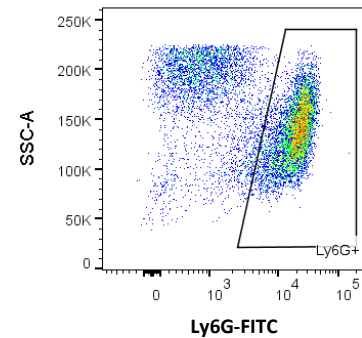

**Appendix Figure S11. Example of gating strategy of CD11b<sup>+</sup>F4/80<sup>+</sup>MHCI<sup>low</sup>Ly6G<sup>+</sup> macrophages in the bone marrow.**

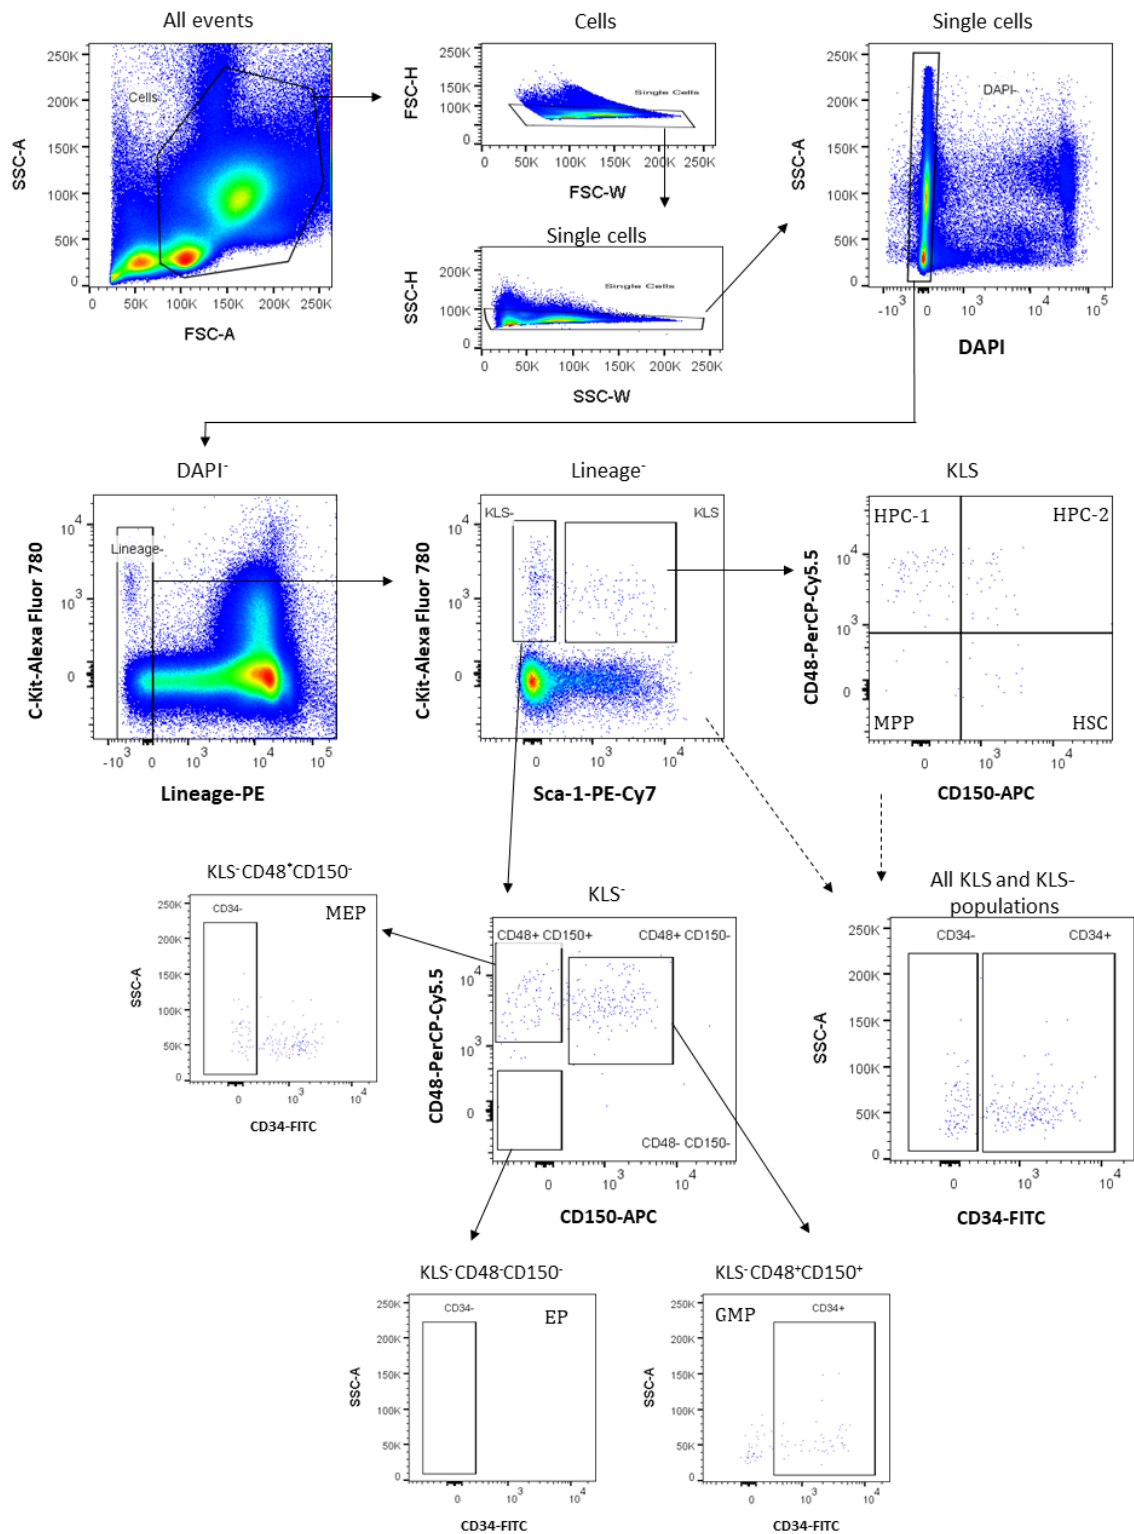

**Appendix Figure S12. Example gating of HSPC populations in PB.**

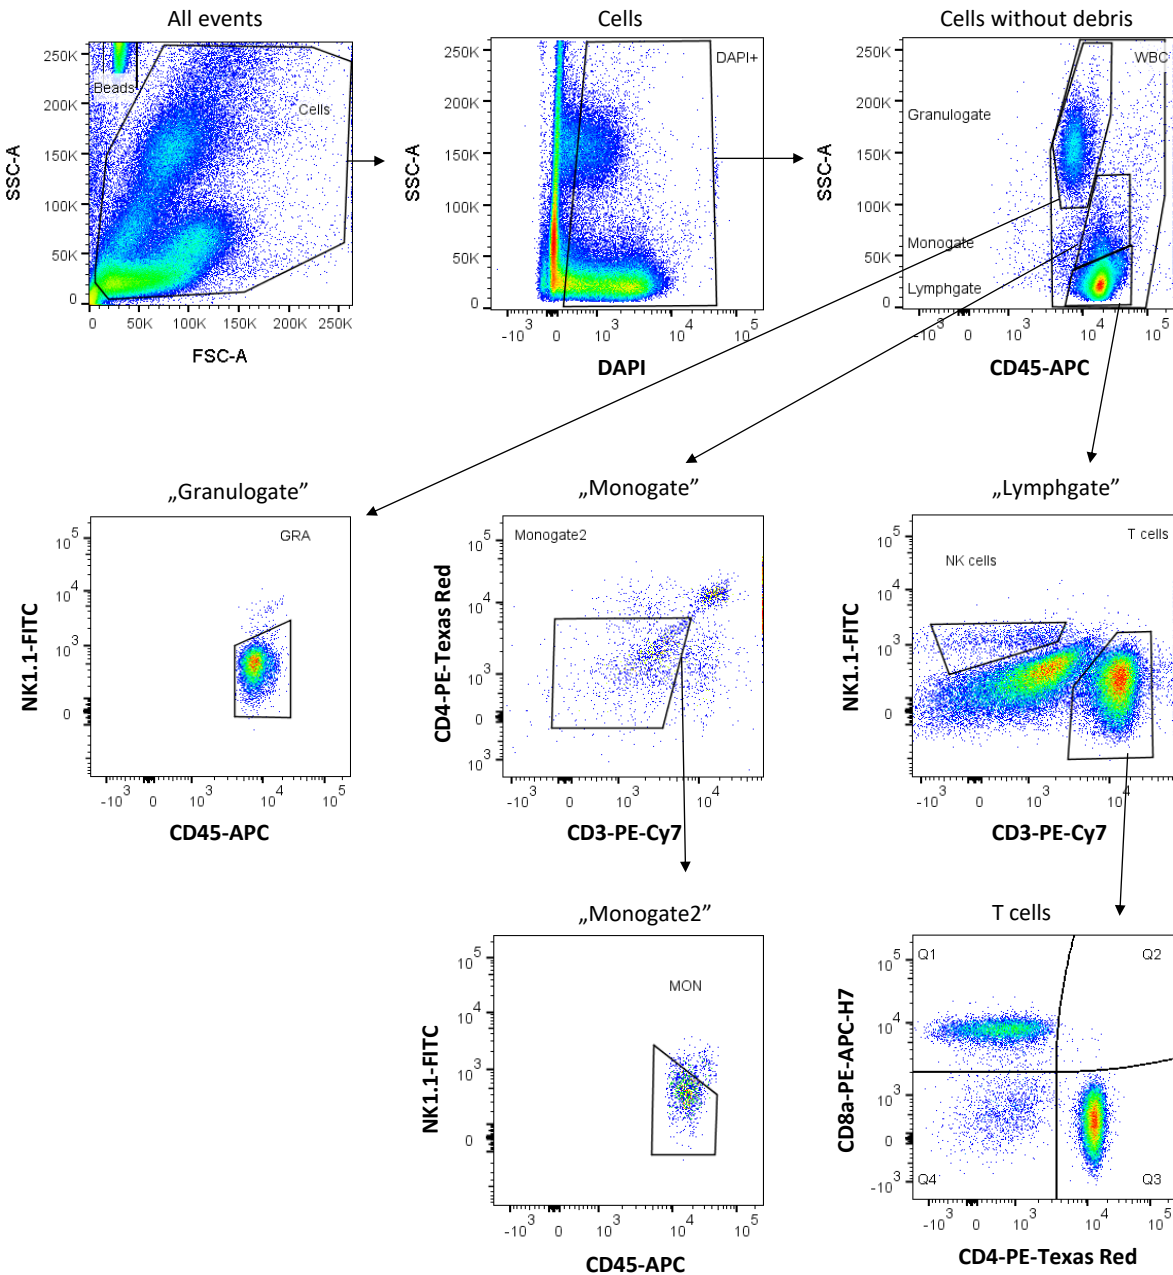

**Appendix Figure S13. Example analysis of main leukocyte populations in blood.** BD Trucounts were used to calculate total number of gated cells per  $\mu\text{l}$  of PB. PB was fixed with BD FACS Lysing Solution.

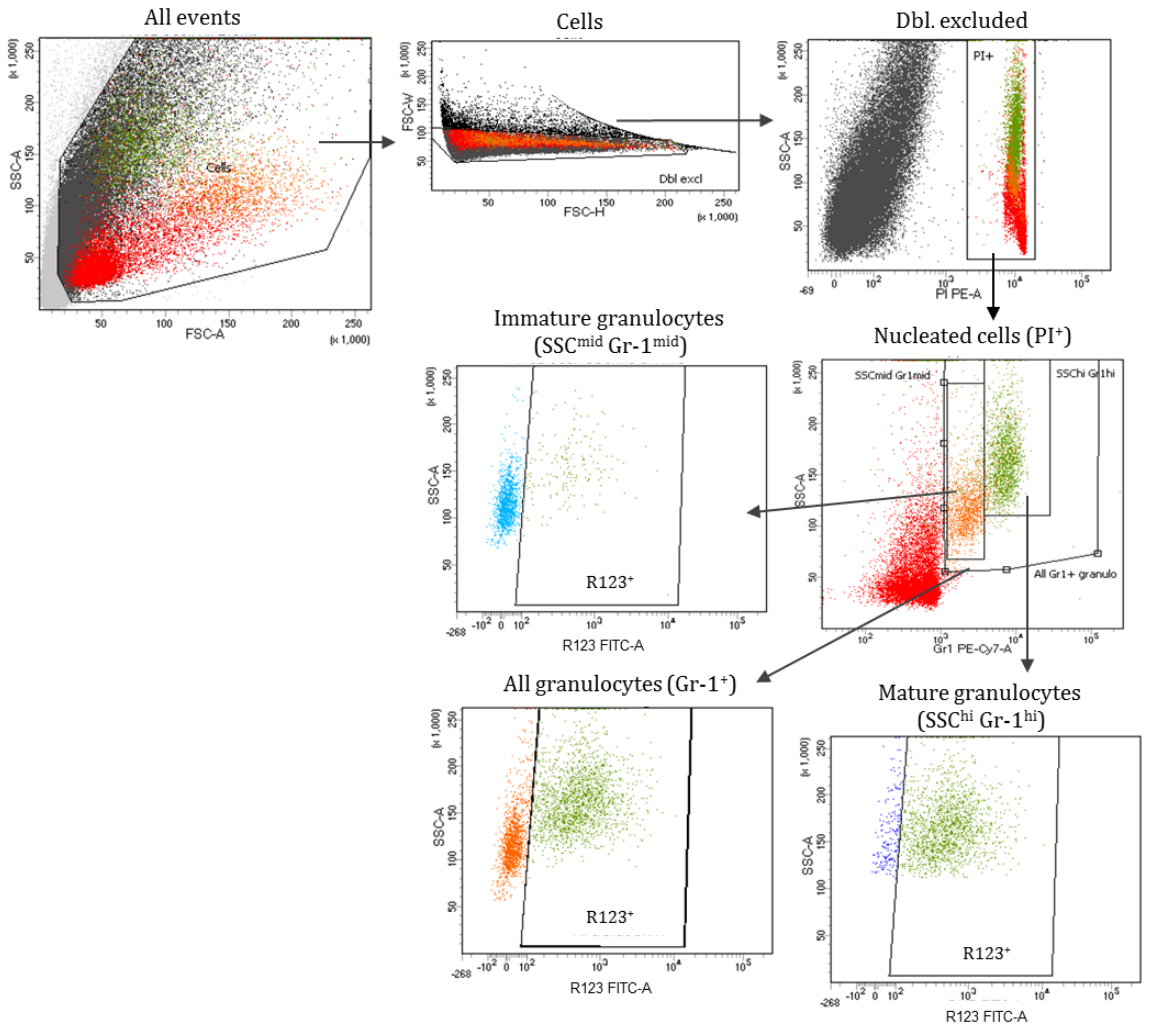

**Appendix Figure S14. Gating strategy for Phagoburst assay analysis.**

| Antigen            | Dye            | Clone        | Company        | Dilution |
|--------------------|----------------|--------------|----------------|----------|
| CD3e               | PE-Cy7         | 145-2C11     | BD Biosciences | 1:50     |
| CD3e               | APC            | 17A2         | BD Biosciences | 1:50     |
| CD4                | PE-CF594       | RM4-5        | BD Biosciences | 1:50     |
| CD8a               | APC-H7         | 53-6.7       | BD Biosciences | 1:50     |
| CD8a               | APC-Cy7        | 53-6.7       | BD Biosciences | 1:50     |
| CD11b              | PE             | M1/70        | BD Biosciences | 1:50     |
| CD11b              | V450           | M1/70        | BD Biosciences | 1:50     |
| CD11b              | PE-CF594       | M1/70        | BD Biosciences | 1:50     |
| CD11c              | AlexaFluor700  | N418         | eBioscience    | 1:50     |
| CD14               | APC-Cy7        | Sa14-2       | Biolegend      | 1:50     |
| CD25               | PE             | PC61         | BD Biosciences | 1:50     |
| CD34               | AlexaFluor700  | RAM34        | BD Biosciences | 1:50     |
| CD34               | FITC           | RAM34        | BD Biosciences | 1:50     |
| CD43               | FITC           | S7           | BD Biosciences | 1:50     |
| CD43               | PE             | S7           | BD Biosciences | 1:50     |
| CD45               | Pacific Orange | 30F-10       | Invitrogen     | 1:50     |
| CD45               | FITC           | 30F-11       | BD Biosciences | 1:50     |
| CD45               | APC            | 30F-11       | BD Biosciences | 1:50     |
| CD45               | APC-Cy7        | 30F-11       | BD Biosciences | 1:50     |
| CD48               | PerCP-Cy5.5    | HM-48-1      | Biolegend      | 1:50     |
| CD150              | APC            | TC15-12F12.2 | Biolegend      | 1:50     |
| CD117 (c-Kit)      | APC-eFluor780  | 2B8          | eBioscience    | 1:50     |
| CD202b (Tie-2)     | PE             | TEK4         | eBioscience    | 1:50     |
| I-A/I-E (MHC II)   | PE-Cy7         | M5/114.15.2  | eBioscience    | 1:50     |
| Ly-6A/E (Sca-1)    | PE-Cy7         | D7           | BD Biosciences | 1:50     |
| Ly-6A/E (Sca-1)    | PE-Cy5         | D7           | Biolegend      | 1:50     |
| Ly6G/Ly6C (Gr-1)   | PE-Cy7         | RB6-8C5      | BD Bioscience  | 1:50     |
| Ly6C               | PerCP-Cy5.5    | HK1.4        | eBioscience    | 1:50     |
| Ly6C               | PerCP-Cy5.5    | AL-21        | BD Biosciences | 1:50     |
| Ly6G               | FITC           | 1A8          | BD Biosciences | 1:50     |
| Ly6G               | BV605          | 1A8          | BD Biosciences | 1:50     |
| Ly55 (NK1.1)       | FITC           | PK136        | BD Biosciences | 1:50     |
| Ly71 (F4/80)       | APC            | BM8          | eBioscience    | 1:50     |
| Lineage staining   |                |              |                |          |
| CD11b              | PE             | M1/70        | BD Biosciences | 1:100    |
| CD45R (B220)       | PE             | RA3-6B2      | BD Biosciences | 1:100    |
| Ly6G/Ly6C (Gr-1)   | PE             | RB6-8C5      | BD Biosciences | 1:100    |
| Ly76 (Ter119)      | PE             | TER-119      | BD Biosciences | 1:100    |
| TCR $\beta$        | PE             | H57-597      | BD Biosciences | 1:100    |
| TCR $\gamma\delta$ | PE             | GL3          | BD Biosciences | 1:100    |
| -                  | DAPI           | -            | Sigma          |          |
| -                  | Hoechst 33342  | -            | Sigma          |          |

**Appendix Table S1.** Antibodies and reagents used for flow cytometry



| Fig | Graph                          | Test                                                      | Comparison     | Symbol | Exact p-value |
|-----|--------------------------------|-----------------------------------------------------------|----------------|--------|---------------|
| 1C  | HO activity                    | one-way Anova with Bonferroni's multiple comparisons test | DMSO vs. CoPP  | ****   | < 0.0001      |
|     |                                |                                                           | DMSO vs. SnPP  | ****   | 0.0009        |
|     |                                |                                                           | CoPP vs. SnPP  | ****   | < 0.0001      |
| 1D  | WBC                            | one-way Anova with Bonferroni's multiple comparisons test | DMSO vs. CoPP  | ****   | < 0.0001      |
|     |                                |                                                           | CoPP vs. SnPP  | ****   | < 0.0001      |
| 1D  | %GRA                           | one-way Anova with Bonferroni's multiple comparisons test | DMSO vs. CoPP  | ****   | < 0.0001      |
|     |                                |                                                           | CoPP vs. SnPP  | ****   | < 0.0001      |
| 1D  | %LYM                           | one-way Anova with Bonferroni's multiple comparisons test | DMSO vs. CoPP  | ****   | < 0.0001      |
|     |                                |                                                           | CoPP vs. SnPP  | ****   | < 0.0001      |
| 1F  | G-CSF                          | one-way Anova with Bonferroni's multiple comparisons test | DMSO vs. CoPP  | ****   | < 0.0001      |
|     |                                |                                                           | CoPP vs. SnPP  | ****   | < 0.0001      |
| 1F  | IL-6                           | one-way Anova with Bonferroni's multiple comparisons test | DMSO vs. CoPP  |        | 0.0734        |
|     |                                |                                                           | CoPP vs. SnPP  |        | 0.0751        |
| 1F  | MCP-1                          | one-way Anova with Bonferroni's multiple comparisons test | DMSO vs. CoPP  | **     | 0.0013        |
|     |                                |                                                           | CoPP vs. SnPP  | **     | 0.0015        |
| 1F  | IP-10                          | one-way Anova with Bonferroni's multiple comparisons test | DMSO vs. CoPP  | ****   | < 0.0001      |
|     |                                |                                                           | CoPP vs. SnPP  | ****   | < 0.0001      |
| 1F  | IL-5                           | one-way Anova with Bonferroni's multiple comparisons test | DMSO vs. CoPP  | *      | 0.0265        |
|     |                                |                                                           | CoPP vs. SnPP  | *      | 0.0218        |
| 2A  | CD45+ cells                    | one-way Anova with Bonferroni's multiple comparisons test | NaCl vs. G-CSF | ****   | < 0.0001      |
|     |                                |                                                           | G-CSF vs. CoPP | *      | 0.0346        |
|     |                                |                                                           | DMSO vs. CoPP  | *      | 0.0155        |
| 2A  | Granulocytes                   | one-way Anova with Bonferroni's multiple comparisons test | NaCl vs. G-CSF | ****   | < 0.0001      |
|     |                                |                                                           | G-CSF vs. CoPP | *      | 0.0179        |
|     |                                |                                                           | DMSO vs. CoPP  | ***    | 0.0004        |
| 2A  | Monocytes                      | one-way Anova with Bonferroni's multiple comparisons test | NaCl vs. G-CSF | *      | 0.0115        |
|     |                                |                                                           | DMSO vs. CoPP  | **     | 0.008         |
| 2A  | Lymphocytes                    | one-way Anova with Bonferroni's multiple comparisons test | NaCl vs. G-CSF | *      | 0.0194        |
|     |                                |                                                           |                |        |               |
| 2A  | T cells                        | one-way Anova with Bonferroni's multiple comparisons test | NaCl vs. G-CSF | *      | 0.0211        |
|     |                                |                                                           | G-CSF vs. CoPP | *      | 0.0161        |
| 2C  | G-CSF                          | one-way Anova with Bonferroni's multiple comparisons test | DMSO vs. CoPP  | **     | 0.0014        |
|     |                                |                                                           |                |        |               |
| 2C  | IL-6                           | one-way Anova with Bonferroni's multiple comparisons test | G-CSF vs. CoPP | ***    | 0.0005        |
|     |                                |                                                           | DMSO vs. CoPP  | ***    | 0.0006        |
| 2C  | MCP-1                          | one-way Anova with Bonferroni's multiple comparisons test | DMSO vs. CoPP  | **     | 0.007         |
|     |                                |                                                           |                |        |               |
| 2D  | CD11b+ F4/80+ MHC II low Ly6G+ | one-way Anova with Bonferroni's multiple comparisons test | NaCl vs. G-CSF | **     | 0.0015        |
|     |                                |                                                           | DMSO vs. CoPP  | *      | 0.0115        |
| 2E  | Spleen weight                  | one-way Anova with Bonferroni's multiple comparisons test | NaCl vs. G-CSF | ***    | 0.0001        |
|     |                                |                                                           | DMSO vs. CoPP  | **     | 0.0039        |
| 3B  | Granulocytes                   | one-way Anova with Bonferroni's multiple comparisons test | NaCl vs. G-CSF | ****   | < 0.0001      |
|     |                                |                                                           | DMSO vs. CoPP  | ****   | < 0.0001      |
| 3B  | Ly6GmidSSCmid granulocytes     | one-way Anova with Bonferroni's multiple comparisons test | NaCl vs. G-CSF | ****   | < 0.0001      |
|     |                                |                                                           | G-CSF vs. CoPP | ****   | < 0.0001      |
| 3B  | Ly6GhiSSChi granulocytes       | one-way Anova with Bonferroni's multiple comparisons test | NaCl vs. G-CSF | ****   | < 0.0001      |
|     |                                |                                                           | DMSO vs. CoPP  | ****   | < 0.0001      |
| 3C  | Ly6Clow Ly6G+                  | one-way Anova with Bonferroni's multiple comparisons test | NaCl vs. G-CSF | ****   | < 0.0001      |
|     |                                |                                                           | DMSO vs. CoPP  | ***    | 0.0007        |
|     |                                |                                                           | G-CSF vs. CoPP | **     | 0.0097        |

**Appendix Table S2.** Exact p values and statistical tests used.

| Fig  | Graph                     | Test                                                         | Comparison             | Symbol | Exact p-value |
|------|---------------------------|--------------------------------------------------------------|------------------------|--------|---------------|
| 3C   | Ly6Clow SSCmed<br>Ly6Gmed | one-way Anova with Bonferroni's<br>multiple comparisons test | NaCl vs. G-CSF         | ****   | < 0.0001      |
|      |                           |                                                              | DMSO vs. CoPP          | ****   | < 0.0001      |
|      |                           |                                                              | G-CSF vs. CoPP         | ****   | < 0.0001      |
| 3C   | Ly6Clow SSChi<br>Ly6Ghi   | one-way Anova with Bonferroni's<br>multiple comparisons test | NaCl vs. G-CSF         | ***    | 0.0004        |
| 3D   | Oxidative burst           | two-way Anova with Bonferroni's<br>multiple comparisons test | E.coli: NaCl vs. G-CSF | *      | 0.0215        |
|      |                           |                                                              | E.coli: DMSO vs. CoPP  | **     | 0.0072        |
|      |                           |                                                              | PMA: DMSO vs. CoPP     |        | 0.076         |
| 4B   | HSC                       | one-way Anova with Bonferroni's<br>multiple comparisons test | G-CSF vs. CoPP         | *      | 0.0417        |
|      |                           |                                                              | DMSO vs. CoPP          | ***    | 0.0003        |
| 4B   | MPP                       | one-way Anova with Bonferroni's<br>multiple comparisons test | DMSO vs. CoPP          | **     | 0.0017        |
| 4B   | HPC-1                     | one-way Anova with Bonferroni's<br>multiple comparisons test | G-CSF vs. CoPP         | **     | 0.0075        |
|      |                           |                                                              | DMSO vs. CoPP          | ****   | < 0.0001      |
| 4B   | HPC-2                     | one-way Anova with Bonferroni's<br>multiple comparisons test | G-CSF vs. CoPP         | **     | 0.0014        |
|      |                           |                                                              | DMSO vs. CoPP          | ****   | < 0.0001      |
| 4C   | HPC-1                     | one-way Anova with Bonferroni's<br>multiple comparisons test | DMSO vs. CoPP          | **     | 0.0038        |
| 4C   | HPC-2                     | one-way Anova with Bonferroni's<br>multiple comparisons test | DMSO vs. CoPP          | **     | 0.0073        |
|      |                           |                                                              |                        |        |               |
| 4D   | KLS-                      | one-way Anova with Bonferroni's<br>multiple comparisons test | G-CSF vs. CoPP         | **     | 0.0016        |
|      |                           |                                                              | DMSO vs. CoPP          | ****   | < 0.0001      |
| 4D   | EP                        | one-way Anova with Bonferroni's<br>multiple comparisons test | NaCl vs. G-CSF         | *      | 0.012         |
|      |                           |                                                              | DMSO vs. CoPP          | *      | 0.0353        |
| 4D   | MEP                       | one-way Anova with Bonferroni's<br>multiple comparisons test | G-CSF vs. CoPP         | ****   | < 0.0001      |
|      |                           |                                                              | DMSO vs. CoPP          | ****   | < 0.0001      |
| 4D   | GMP                       | one-way Anova with Bonferroni's<br>multiple comparisons test | G-CSF vs. CoPP         | *      | 0.0245        |
|      |                           |                                                              | DMSO vs. CoPP          | ***    | 0.0008        |
| 4E   | KLS-                      | one-way Anova with Bonferroni's<br>multiple comparisons test | NaCl vs. G-CSF         | ****   | < 0.0001      |
|      |                           |                                                              | DMSO vs. CoPP          |        | 0.0729        |
|      |                           |                                                              | G-CSF vs. CoPP         | **     | 0.0012        |
| 4E   | EP                        | one-way Anova with Bonferroni's<br>multiple comparisons test | NaCl vs. G-CSF         | *      | 0.0176        |
|      |                           |                                                              | DMSO vs. CoPP          | *      | 0.018         |
| 4E   | MEP                       | one-way Anova with Bonferroni's<br>multiple comparisons test | NaCl vs. G-CSF         | ***    | 0.0004        |
|      |                           |                                                              | DMSO vs. CoPP          | **     | 0.0045        |
| 4E   | GMP                       | one-way Anova with Bonferroni's<br>multiple comparisons test | NaCl vs. G-CSF         | ***    | 0.0001        |
|      |                           |                                                              | G-CSF vs. CoPP         | ***    | 0.0001        |
| 5Ai  | Granulocytes              | one-way Anova with Bonferroni's<br>multiple comparisons test | NaCl vs. G-CSF         | *      | 0.0392        |
|      |                           |                                                              | NaCl vs. CoPP          | ****   | < 0.0001      |
|      |                           |                                                              | G-CSF vs. CoPP         | *      | 0.012         |
| 5Aii | KLS                       | one-way Anova with Bonferroni's<br>multiple comparisons test | NaCl vs. CoPP          | ****   | < 0.0001      |
|      |                           |                                                              | G-CSF vs. CoPP         | ****   | < 0.0001      |
| 5B   | 2 weeks: WBC              | one-way Anova with Bonferroni's<br>multiple comparisons test | NaCl vs. CoPP          | *      | 0.0022        |
| 5B   | 2 weeks: PLT              | one-way Anova with Bonferroni's<br>multiple comparisons test | NaCl vs. CoPP          | **     | 0.0053        |
| 5B   | 2 weeks: HCT              | one-way Anova with Bonferroni's<br>multiple comparisons test | NaCl vs. CoPP          | **     | 0.0031        |
| 5C   | CD45+ cells               | two-way Anova with Bonferroni's<br>multiple comparisons test | NaCl vs. G-CSF         | ****   | < 0.0001      |
|      |                           |                                                              | NaCl vs. CoPP          | ****   | < 0.0001      |
|      |                           |                                                              | G-CSF vs. CoPP         | **     | 0.0099        |

**Appendix Table S2.** Exact p values and statistical tests used – c.d.

| Fig | Graph                                 | Test                                                      | Comparison                                 | Symbol | Exact p-value |
|-----|---------------------------------------|-----------------------------------------------------------|--------------------------------------------|--------|---------------|
| 5C  | Granulocytes                          | two-way Anova with Bonferroni's multiple comparisons test | NaCl vs. G-CSF                             | ***    | 0.0005        |
|     |                                       |                                                           | NaCl vs. CoPP                              | ****   | < 0.0001      |
|     |                                       |                                                           | G-CSF vs. CoPP                             | *      | 0.0271        |
| 5C  | T cells                               | two-way Anova with Bonferroni's multiple comparisons test | NaCl vs. G-CSF                             | **     | 0.0093        |
|     |                                       |                                                           | NaCl vs. CoPP                              | **     | 0.0028        |
| 5C  | B cells                               | two-way Anova with Bonferroni's multiple comparisons test | NaCl vs. G-CSF                             | ***    | 0.0008        |
|     |                                       |                                                           | NaCl vs. CoPP                              | ****   | < 0.0001      |
|     |                                       |                                                           | G-CSF vs. CoPP                             | *      | 0.0126        |
| 5D  | KLS                                   | Kruskal-Wallis with Dunn's multiple comparisons test      | NaCl vs. G-CSF                             | *      | 0.0465        |
|     |                                       |                                                           | NaCl vs. CoPP                              | *      | 0.011         |
| 5E  | Mice with > 1% of GFP chimerism in PB | Fisher's exact test, two-tailed                           | G-CSF vs. CoPP                             |        | 0.24          |
| 5F  | CD45+ cells                           | Kruskal-Wallis with Dunn's multiple comparisons test      | NaCl vs. CoPP                              | **     | 0.0033        |
| 5F  | B cells                               | Kruskal-Wallis with Dunn's multiple comparisons test      | NaCl vs. CoPP                              | **     | 0.0087        |
| 5I  | KLS                                   | Kruskal-Wallis with Dunn's multiple comparisons test      | NaCl vs. CoPP                              | **     | 0.0074        |
| 6A  | G-CSF                                 | one-way Anova with Bonferroni's multiple comparisons test | DMSO vs. CoPP + IgG ctrl                   | **     | 0.001         |
|     |                                       |                                                           | CoPP + IgG ctrl vs. CoPP + $\alpha$ -G-CSF | ****   | < 0.0001      |
| 6B  | CD45+ cells                           | one-way Anova with Bonferroni's multiple comparisons test | DMSO vs. CoPP + IgG ctrl                   | ****   | < 0.0001      |
|     |                                       |                                                           | CoPP + IgG ctrl vs. CoPP + $\alpha$ -G-CSF | ****   | < 0.0001      |
| 6B  | Granulocytes                          | one-way Anova with Bonferroni's multiple comparisons test | DMSO vs. CoPP + IgG ctrl                   | ***    | 0.0002        |
|     |                                       |                                                           | CoPP + IgG ctrl vs. CoPP + $\alpha$ -G-CSF | ****   | < 0.0001      |
| 6B  | HSC                                   | one-way Anova with Bonferroni's multiple comparisons test | DMSO vs. CoPP + IgG ctrl                   | ***    | 0.0003        |
|     |                                       |                                                           | CoPP + IgG ctrl vs. CoPP + $\alpha$ -G-CSF | ***    | 0.0006        |
| 6C  | WBC                                   | one-way Anova with Bonferroni's multiple comparisons test | HO-1 <sup>-/-</sup> : DMSO vs. CoPP        | **     | 0.0064        |
| 6D  | %GRA                                  | one-way Anova with Bonferroni's multiple comparisons test | HO-1 <sup>+/+</sup> : DMSO vs. CoPP        | **     | 0.0072        |
|     |                                       |                                                           | HO-1 <sup>-/-</sup> : DMSO vs. CoPP        | *      | 0.0376        |
| 6E  | G-CSF                                 | one-way Anova with Bonferroni's multiple comparisons test | HO-1 <sup>+/+</sup> : DMSO vs. CoPP        | *      | 0.0248        |
| 6E  | IL-6                                  | one-way Anova with Bonferroni's multiple comparisons test | HO-1 <sup>-/-</sup> : DMSO vs. CoPP        |        | 0.0558        |
| 6E  | MCP-1                                 | one-way Anova with Bonferroni's multiple comparisons test | HO-1 <sup>+/+</sup> : DMSO vs. CoPP        | **     | 0.0018        |
|     |                                       |                                                           | HO-1 <sup>-/-</sup> : DMSO vs. CoPP        | *      | 0.0188        |
| 6F  | CD45+ cells                           | two-way Anova with Bonferroni's multiple comparisons test | Nrf2 <sup>+/+</sup> : DMSO vs. CoPP        | *      | 0.0402        |
|     |                                       |                                                           | Nrf2 <sup>-/-</sup> : DMSO vs. CoPP        | **     | 0.0017        |
| 6G  | %GRA                                  | two-way Anova with Bonferroni's multiple comparisons test | Nrf2 <sup>+/+</sup> : DMSO vs. CoPP        | ****   | < 0.0001      |
|     |                                       |                                                           | Nrf2 <sup>-/-</sup> : DMSO vs. CoPP        | ****   | < 0.0001      |
| 6H  | G-CSF                                 | two-way Anova with Bonferroni's multiple comparisons test | Nrf2 <sup>-/-</sup> : DMSO vs. CoPP        |        | 0.0674        |
| 6H  | IL-6                                  | two-way Anova with Bonferroni's multiple comparisons test | Nrf2 <sup>+/+</sup> : DMSO vs. CoPP        | *      | 0.049         |
|     |                                       |                                                           | Nrf2 <sup>-/-</sup> : DMSO vs. CoPP        |        | 0.0738        |
| 6H  | MCP-1                                 | two-way Anova with Bonferroni's multiple comparisons test | Nrf2 <sup>-/-</sup> : DMSO vs. CoPP        | ****   | < 0.0001      |

**Appendix Table S2.** Exact p values and statistical tests used – c.d.

| Fig  | Graph                      | Test                                                      | Comparison             | Symbol | Exact p-value |
|------|----------------------------|-----------------------------------------------------------|------------------------|--------|---------------|
| EV3A | Granulocytes               | one-way Anova with Bonferroni's multiple comparisons test | NaCl vs. CoPP          | ***    | 0.0002        |
|      |                            |                                                           | G-CSF vs. CoPP         | *      | 0.029         |
| EV3A | Ly6GmidSSCmid granulocytes | one-way Anova with Bonferroni's multiple comparisons test | NaCl vs. CoPP          | *      | 0.0234        |
| EV3A | Ly6GhiSSChi granulocytes   | one-way Anova with Bonferroni's multiple comparisons test | NaCl vs. CoPP          | ****   | < 0.0001      |
|      |                            |                                                           | G-CSF vs. CoPP         | ****   | < 0.0001      |
| EV3B | G-CSF                      | one-way Anova with Bonferroni's multiple comparisons test | NaCl vs. CoPP          | *      | 0.0105        |
|      |                            |                                                           | G-CSF vs. CoPP         | *      | 0.0203        |
| EV3B | IL-6                       | one-way Anova with Bonferroni's multiple comparisons test | NaCl vs. CoPP          | **     | 0.0035        |
|      |                            |                                                           | G-CSF vs. CoPP         | **     | 0.0022        |
|      |                            |                                                           | G-CSF+IL-6 vs. CoPP    | **     | 0.0022        |
| EV3B | CCL2 (MCP-1)               | one-way Anova with Bonferroni's multiple comparisons test | NaCl vs. CoPP          | *      | 0.0382        |
|      |                            |                                                           | G-CSF vs. CoPP         | *      | 0.0321        |
|      |                            |                                                           | G-CSF+IL-6 vs. CoPP    | *      | 0.0359        |
| S2   | Immature granulocytes      | two-way Anova with Bonferroni's multiple comparisons test | E.coli: NaCl vs. G-CSF | ****   | < 0.0001      |
|      |                            |                                                           | E.coli: G-CSF vs. CoPP | **     | 0.0024        |
|      |                            |                                                           | PMA: NaCl vs. G-CSF    | ***    | 0.0007        |
|      |                            |                                                           | PMA: DMSO vs. CoPP     | ***    | 0.0006        |
| S2   | Mature granulocytes        | two-way Anova with Bonferroni's multiple comparisons test | PMA: NaCl vs. G-CSF    | *      | 0.0124        |
|      |                            |                                                           | PMA: DMSO vs. CoPP     |        | 0.0742        |
| S3A  | KLS PB                     | one-way Anova with Bonferroni's multiple comparisons test | G-CSF vs. CoPP         | ****   | < 0.0001      |
|      |                            |                                                           | DMSO vs. CoPP          | **     | 0.0044        |
| S3A  | KLS BM                     | one-way Anova with Bonferroni's multiple comparisons test | DMSO vs. CoPP          | *      | 0.0183        |
| S3B  | KLS CD34-                  | one-way Anova with Bonferroni's multiple comparisons test | NaCl vs. G-CSF         | **     | 0.0092        |
|      |                            |                                                           | DMSO vs. CoPP          | **     | 0.0044        |
| S3B  | KLS CD48-CD150+CD34-       | one-way Anova with Bonferroni's multiple comparisons test | NaCl vs. G-CSF         | *      | 0.0216        |
|      |                            |                                                           | DMSO vs. CoPP          | **     | 0.0017        |
| S5B  | G-CSF                      | unpaired two-tailed T-test                                | Spleen: NaCl vs. CoPP  |        | 0.0568        |
| S6   | MON%                       | one-way Anova with Bonferroni's multiple comparisons test | Nrf2+/- vs. Nrf2-/-    | ***    | 0.0003        |
| S8B  | ALP                        | one-way Anova with Bonferroni's multiple comparisons test | NaCl vs. G-CSF         | **     | 0.0012        |
|      |                            |                                                           | DMSO vs. CoPP          | **     | 0.0023        |
| S8B  | ALT                        | one-way Anova with Bonferroni's multiple comparisons test | G-CSF vs. G-CSF        | ***    | 0.0003        |
|      |                            |                                                           | DMSO vs. CoPP          | ***    | 0.0003        |
| S8B  | AST                        | one-way Anova with Bonferroni's multiple comparisons test | G-CSF vs. G-CSF        | ****   | < 0.0001      |
|      |                            |                                                           | DMSO vs. CoPP          | ****   | < 0.0001      |
| S8B  | BUN                        | one-way Anova with Bonferroni's multiple comparisons test | G-CSF vs. G-CSF        | ***    | 0.0005        |
| S8B  | CPK                        | one-way Anova with Bonferroni's multiple comparisons test | DMSO vs. CoPP          | **     | 0.0059        |
| S8B  | GLU                        | one-way Anova with Bonferroni's multiple comparisons test | G-CSF vs. G-CSF        | *      | 0.0178        |
| S8B  | LDH                        | one-way Anova with Bonferroni's multiple comparisons test | DMSO vs. CoPP          | **     | 0.0018        |

**Appendix Table S2.** Exact p values and statistical tests used – c.d.
