# Supplementary material for: Cobalt protoporphyrin IX increases endogenous G‐CSF and mobilizes HSC and granulocytes to the blood
Source: PubMed Central journal article supplement (PMC6895613; doi:10.15252/emmm.201809571), 2019-11-11
Supplement: EMMM-11-e09571-s002.pdf [file EMMM-11-e09571-s002.pdf]

## Expanded View Figures

**Figure EV1. Schemes of mobilization experiments.**

- A CoPP and SnPP treatments in C3H mice; 2-month-old female C3H mice were treated with porphyrins or solvent control (DMSO) at days 1, 3, and 5. Mice were sacrificed 24 h after the last injection, and spleen, bone marrow, and peripheral blood were collected for further analysis.
- B CoPP and G-CSF treatments in C57BL6xFVB and C57BL6 mice; 3- to 4-month-old C57BL6xFVB female mice were treated with NaCl, G-CSF, DMSO, or CoPP. Two- to 3-month-old female C57BL6 mice were treated with NaCl, G-CSF, G-CSF + IL-6, or CoPP. Mice were injected i.p. every day for 5 days and sacrificed 6 h after last injection.
- C Neutralizing antibodies experiment; 2.5- to 3.5-month-old male C57BL6 mice were treated with anti-G-CSF, anti-G-CSF + anti-IL-6, or the control antibodies 1 h before CoPP treatment every day for 5 days, and sacrificed 6 h after last injection.
- D CoPP treatment in HO-1<sup>+/+</sup> and HO-1<sup>-/-</sup> mice; 4- to 5-month-old male and female HO-1<sup>+/+</sup> and HO-1<sup>-/-</sup> mice were injected with CoPP or DMSO every second day for 5 days, and sacrificed 24 h after last injection;
- E CoPP treatment in Nrf2<sup>+/+</sup> and Nrf2<sup>-/-</sup> mice; 2-month-old female C57BL6 Nrf2<sup>+/+</sup> and Nrf2<sup>-/-</sup> mice were injected with CoPP or DMSO every day for 5 days, and sacrificed 6 h after last injection.

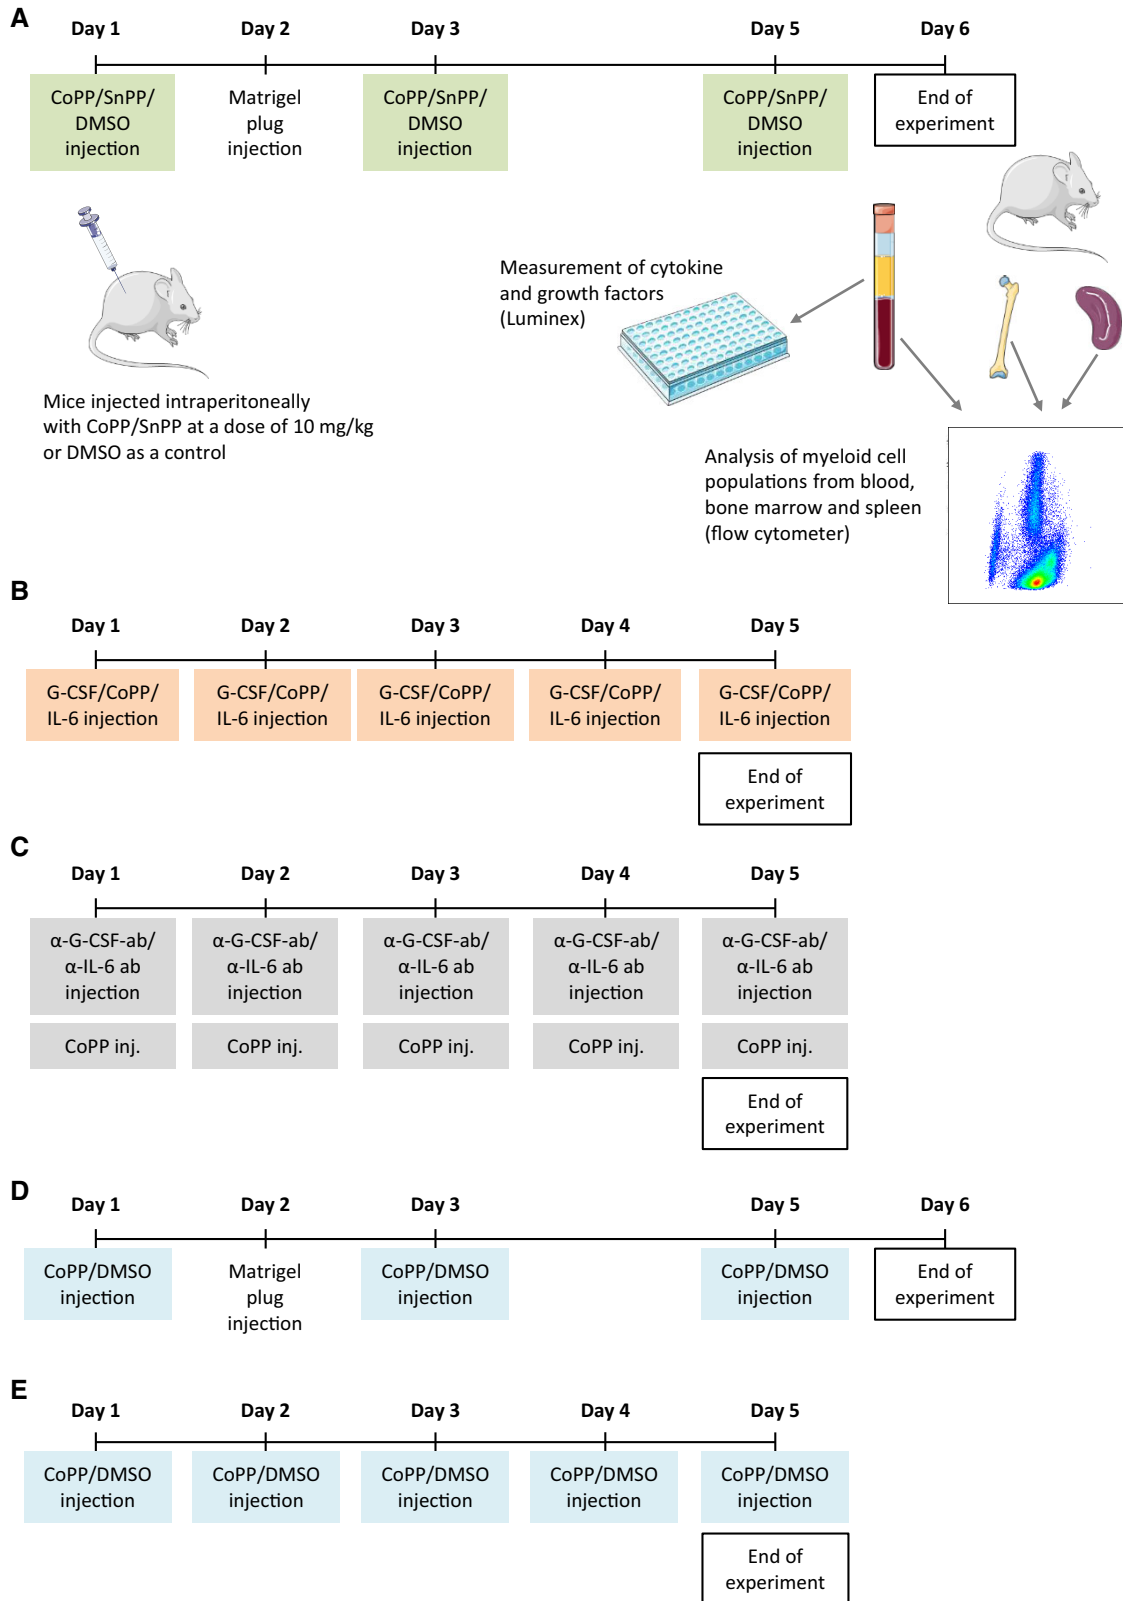

Figure EV1.

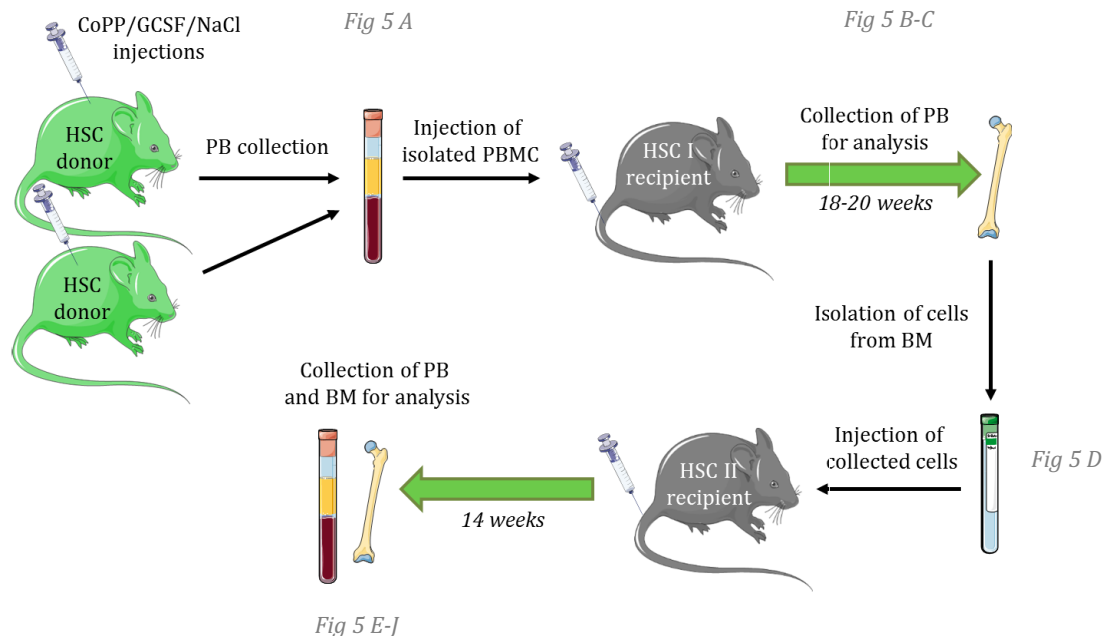

**Figure EV2. Scheme of mobilized blood transplantation experiment.**

PBMC from GFP<sup>+</sup> mice mobilized with NaCl, G-CSF, or CoPP were isolated by density gradient centrifugation.  $5 \times 10^6$  PBMC were transplanted to lethally irradiated GFP<sup>-</sup> recipients together with  $1 \times 10^5$  BM supporting cells. Two independent experiments of primary transplantation were performed, and the results were pooled (NaCl:  $n = 8$ , G-CSF:  $n = 7$ , CoPP:  $n = 9$ ); after 18–20 weeks,  $10 \times 10^6$  of BM cells from primary recipients were transplanted to lethally irradiated secondary recipients.

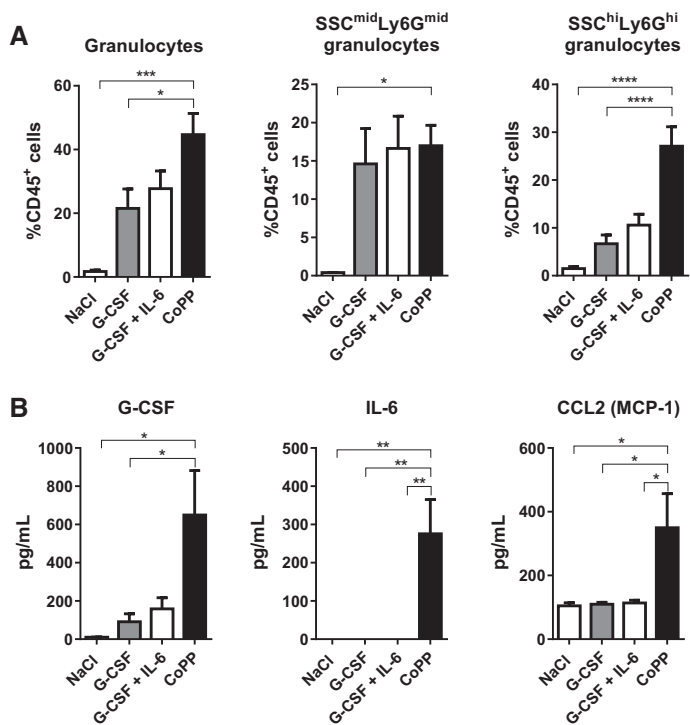

**Figure EV3. Mobilization with G-CSF and IL-6 does not mimic the effect of CoPP.**

C57BL6 mice were injected with G-CSF, G-CSF + IL-6, CoPP, or solvent control (NaCl) daily for 5 days. Samples were collected 6 h after the last injection.

**A** Mice treated with CoPP have higher percentage of total granulocytes and SSC<sup>hi</sup>Ly6G<sup>hi</sup> mature granulocytes, than mice treated with G-CSF only. Addition of recombinant IL-6 to G-CSF does not improve mature granulocytes mobilization.

**B** Plasma concentrations of G-CSF, IL-6, and MCP-1.

Data information: Results are shown as mean + SEM, one-way ANOVA with Bonferroni post-test, NaCl  $n = 5$ , G-CSF, G-CSF + IL-6 and CoPP:  $n = 6$  mice per group. \* $P \leq 0.05$ ; \*\* $P \leq 0.01$ ; \*\*\* $P \leq 0.001$ ; \*\*\*\* $P \leq 0.0001$ .
